# Supplementary material
Source: PubMed Central journal article supplement (PMC9244777)
Supplement: NIHMS1815959-supplement-Supp_Data.pdf [file NIHMS1815959-supplement-Supp_Data.pdf]

---

**Supplementary information**

---

**Circulating metabolite homeostasis  
achieved through mass action**

---

In the format provided by the  
authors and unedited

## SUPPLEMENTARY INFORMATION.

**Supplementary Table S1. Akaike information criterion (AIC) comparison of different quantitative models.** Data from **Fig. 2**, **Fig. 4A** (refed state), **Fig. 4B** (lower panel), **Fig. 5** (top panel), and **Fig. S5B** were analyzed with GraphPad Prism 8 to compare different models to the default model in the leftmost column heading.  $\Delta\text{AICc} = \text{AICc}_{\text{default}} - \text{AICc}_{\text{alternative}}$ , and accordingly negative  $\Delta\text{AICc}$  values reflect the default being preferred while positive values reflect the alternative being preferred. Differences greater than +2 reflect the alternative being significantly preferred and are highlighted in red.

**Supplementary Table S2. Different bolus doses are cleared with similar elimination constants.** Mean  $\pm$  SD, n=3 mice.

**Supplementary Table S3. Fasting serum concentrations of essential amino acids reflect the surplus flux generated by protein degradation (beyond that needed for protein synthesis) and the amino acid's propensity for TCA oxidation (*b*).**  $R_d$ , unperturbed consumption flux (equivalent to  $F_{\text{circ}}$ ) from Hui et. al. (*Error! Reference source not found.*);  $S$ , protein synthesis flux (sum of observed tissue protein synthesis rates, corrected for the relevant amino acid's abundance in protein), mean  $\pm$  SD, n=4 mice per time point for calculation; TCA oxidation flux  $T_{\text{SS}} = R_d - S$ ;  $b$ , slope of relationship between consumption flux and circulating concentration (best-fitted value from linear regression in **Fig. 2**);  $[M]_{\text{ss}}$ , steady-state unperturbed essential amino acid concentrations calculated by the equation (10). Fasting serum essential amino acid concentrations were experimentally measured using LC-MS and isotopic standards. Mice were fasted from 9 AM to 5 PM (8 h fasting) and blood was taken at 5 PM. Mean  $\pm$  SD, n=6 mice. Note that the calculated circulating concentrations based on equation (10) ( $[M]_{\text{ss}}$ ) generally agree well with the experimental measurements.

**Supplementary Table S4. Flux calculation for Figure 6F.**

**Supplementary Table S5. Composition of high, normal, and low protein diets.**

**Supplementary Table S6. Relative amino acid levels across dietary conditions.** P-values were calculated by two-tailed Student's t-test without correction for multiple comparison. Amino acids with  $p < 0.01$  are highlighted in red.

**Supplementary Table S7. Doses used for intravenous bolus injections and infusions for each tracer.**

**For Figure 2:**

| $\Delta\text{AICc}$ compared to linear regression with fixed y-intercept | Linear regression | Michaelis-Menten |
|--------------------------------------------------------------------------|-------------------|------------------|
| Valine infusion                                                          | -3.93             | -6.90            |
| Phenylalanine infusion                                                   | -4.09             | -1.98            |
| Lysine infusion                                                          | -3.67             | -0.86            |
| Methionine infusion                                                      | 12.00             | 25.46            |

| $\Delta\text{AICc}$ compared to linear regression | Michaelis-Menten |
|---------------------------------------------------|------------------|
| 3-HB infusion                                     | 1.33             |
| Citrate infusion                                  | -2.77            |
| Alanine infusion                                  | -0.78            |
| Serine infusion                                   | 8.65             |

**For Figure 4A:**

| $\Delta\text{AICc}$ compared to linear regression with fixed slope and y-intercept | Linear regression |
|------------------------------------------------------------------------------------|-------------------|
| Valine infusion                                                                    | -22.10            |
| Lysine infusion                                                                    | -6.51             |
| Serine infusion                                                                    | -24.90            |
| 3-HB infusion                                                                      | -24.30            |
| Alanine infusion                                                                   | -10.53            |
| Citrate infusion                                                                   | -4.486            |
| Methionine infusion                                                                | 14.27             |

**For Figure 4B:**

| $\Delta\text{AICc}$ compared to linear regression with fixed y-intercept | Linear regression | Michaelis-Menten |
|--------------------------------------------------------------------------|-------------------|------------------|
| Valine infusion with BT2                                                 | 3.62              | 10.01            |

**For Figure 5:**

| $\Delta\text{AICc}$ compared to linear regression with fixed y-intercept | Linear regression | Michaelis-Menten |
|--------------------------------------------------------------------------|-------------------|------------------|
| Liver                                                                    | -0.20             | -1.15            |
| Kidney                                                                   | -4.61             | -2.46            |
| Pancreas                                                                 | 6.31              | 10.14            |

**For Figure S5B:**

| $\Delta\text{AICc}$ compared to linear regression with fixed y-intercept | Linear regression | Michaelis-Menten |
|--------------------------------------------------------------------------|-------------------|------------------|
| Brain                                                                    | -0.48             | -0.21            |
| Heart                                                                    | -4.05             | -4.67            |
| Lung                                                                     | -4.83             | -5.44            |
| Jejunum                                                                  | 0.30              | 1.58             |
| Spleen                                                                   | 2.87              | 4.98             |
| Quadriceps                                                               | -1.90             | 2.3              |

Supplementary Table S1. Akaike information criterion (AIC) comparison of different quantitative models.

| <b>Elimination constant <math>\gamma</math> (min<sup>-1</sup>)</b> | <b>Low dose</b>      | <b>Medium dose</b>   | <b>High dose</b>     |
|--------------------------------------------------------------------|----------------------|----------------------|----------------------|
| <b>Valine</b>                                                      | <b>0.077 ± 0.005</b> | <b>0.071 ± 0.009</b> | <b>0.069 ± 0.009</b> |
| <b>Methionine</b>                                                  | <b>0.064 ± 0.010</b> | <b>0.049 ± 0.025</b> | <b>0.061 ± 0.005</b> |
| <b>Leucine</b>                                                     | <b>0.046 ± 0.012</b> | <b>0.073 ± 0.020</b> | <b>0.064 ± 0.013</b> |
| <b>Lysine</b>                                                      | <b>0.042 ± 0.014</b> | <b>0.046 ± 0.026</b> | <b>0.056 ± 0.005</b> |

Supplementary Table S2. Different bolus doses are cleared with similar elimination constants.

$$[M_{SS}] = (R_d - S)/b = T_{SS}/b$$

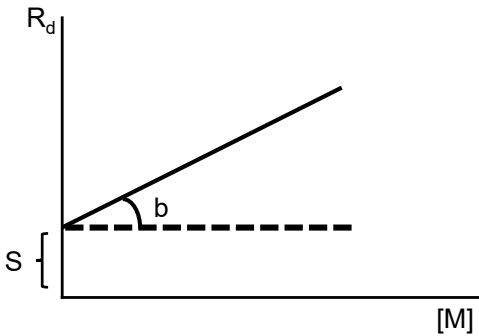

| Parameters (units)                  | Valine  | Methionine | Phenylalanine | Lysine  |
|-------------------------------------|---------|------------|---------------|---------|
| $R_d$<br>(nmol/g bodyweight/min)    | 9.6±0.4 | 3.9±1.6    | 5.9±0.8       | 9.3±1.8 |
| $S$<br>(nmol/g bodyweight/min)      | 6.4±0.5 | 1.8±0.1    | 3.7±0.3       | 6.4±0.5 |
| $T_{SS}$<br>(nmol/g bodyweight/min) | 3.2±0.6 | 2.1±1.6    | 2.2±0.9       | 2.9±1.9 |
| $b$ (min <sup>-1</sup> )            | 0.018   | 0.049      | 0.055         | 0.024   |
| $[MSS]_{\infty}$ (μM)               | 178±33  | 43±33      | 40±16         | 121±79  |
| Fasting serum concentration (μM)    | 167±14  | 63±9       | 73±7          | 282±46  |

Supplementary Table S3. Fasting serum concentrations of essential amino acids reflect the surplus flux generated by protein degradation (beyond that needed for protein synthesis) and the amino acid's propensity for TCA oxidation ( $b$ ).

| Valine production and consumption fluxes             | Measurements and calculations                                                                                               | Figure | Mean±s.d.<br>(nmol/g<br>bodyweight/min) |
|------------------------------------------------------|-----------------------------------------------------------------------------------------------------------------------------|--------|-----------------------------------------|
| Fasted-state production from protein degradation (P) | Tracer infusion (Hui et al. (18))                                                                                           | S8     | 10.2±1.6                                |
| Fasted-state consumption by protein synthesis (S)    | Sum of observed tissue protein synthesis rates, corrected for valine fraction in protein                                    | 6B     | 6.2±0.5                                 |
| Fasted-state consumption by TCA cycle (T)            | Flux balance: $T = P - S$                                                                                                   | -      | 4.0±1.7                                 |
| Fed-state production from dietary protein (D)        | Flux calculated by:<br>$\frac{\text{food intake} * \text{valine percentage}}{\text{infusion duration} * \text{bodyweight}}$ | 6E     | 8.9                                     |
| Fed-state production from protein degradation (P)    | Double tracer infusion:<br>$P = R_{\text{inf}} * E_{[\text{U-13C}]\text{-Val}} / E_{[\text{U-2H}]\text{-Val}}$              | 6D     | 5.0±0.3                                 |
| Fed-state consumption by protein synthesis (S)       | Sum of observed tissue protein synthesis rates, corrected for valine fraction in protein                                    | 6B     | 6.6±0.3                                 |
| Fed-state consumption by TCA cycle (T)               | Flux balance: $T = D + P - S$                                                                                               | -      | 7.2±0.4                                 |

Supplementary Table S4. Flux calculation for Figure 6F.

| Diets          | Protein (kcal%) | Carbohydrate (kcal%) | Fat (kcal%) | Cellulose (gm%) | Inulin (gm%) | Total Calories (kcal/gm) |
|----------------|-----------------|----------------------|-------------|-----------------|--------------|--------------------------|
| Low Protein    | 10              | 75                   | 15          | 7               | 2.3          | 4.084                    |
| Normal Protein | 20              | 65                   |             |                 |              |                          |
| High Protein   | 40              | 45                   |             |                 |              |                          |

**Supplementary Table S5. Composition of high, normal, and low protein diets.**

|               | Group Mean               |                          | t-test               |
|---------------|--------------------------|--------------------------|----------------------|
|               | log <sub>2</sub> (HP/NP) | log <sub>2</sub> (LP/NP) | p-value (HP vs LP)   |
|               | <b>Fed</b>               |                          |                      |
| Valine        | 1.22±0.72                | 0.24±0.30                | 2.7x10 <sup>-7</sup> |
| Isoleucine    | 1.12±0.66                | 0.23±0.43                | 3.4x10 <sup>-6</sup> |
| Leucine       | 1.24±0.76                | 0.24±0.44                | 2.2x10 <sup>-6</sup> |
| Phenylalanine | 0.55±0.29                | 0.13±0.24                | 2.0x10 <sup>-5</sup> |
| Tryptophan    | 0.99±0.17                | 0.39±0.55                | 1.1x10 <sup>-2</sup> |
| Methionine    | 0.52±0.37                | 0.33±0.32                | 7.0x10 <sup>-4</sup> |
| Lysine        | 0.38±0.16                | 0.17±0.24                | 1.0x10 <sup>-3</sup> |
| Threonine     | 0.43±0.50                | 0.41±0.43                | 2.8x10 <sup>-3</sup> |
| Histidine     | 0.16±0.07                | 0.09±0.18                | 1.2x10 <sup>-2</sup> |
| Asparagine    | 0.41±0.07                | 0.31±0.38                | 2.7x10 <sup>-2</sup> |
| Arginine      | 0.35±0.13                | 0.24±0.23                | 8.3x10 <sup>-2</sup> |
| Glycine       | -0.29±0.02               | 0.13±0.22                | 1.2x10 <sup>-2</sup> |
| Glutamine     | 0.07±0.36                | 0.13±0.23                | 1.8x10 <sup>-2</sup> |
| Alanine       | 0.01±0.17                | 0.12±0.22                | 8.9x10 <sup>-2</sup> |
| Tyrosine      | 1.45±0.09                | 0.46±0.41                | 3.1x10 <sup>-4</sup> |
| Proline       | 0.58±0.50                | 0.26±0.39                | 2.1x10 <sup>-4</sup> |
| Serine        | 0.18±0.04                | 0.25±0.34                | 2.4x10 <sup>-1</sup> |
| Glutamate     | 0.08±0.04                | 0.23±0.14                | 3.8x10 <sup>-1</sup> |
| Aspartate     | 0.14±0.16                | 0.21±0.16                | 4.2x10 <sup>-1</sup> |
|               |                          |                          |                      |
|               |                          |                          |                      |
|               | Group Mean               |                          | t-test               |
|               | log <sub>2</sub> (HP/NP) | log <sub>2</sub> (LP/NP) | p-value (HP vs LP)   |
|               | <b>Fasted</b>            |                          |                      |
| Valine        | 0.04±0.42                | 0.17±0.19                | 1.1x10 <sup>-3</sup> |
| Leucine       | 0.01±0.39                | 0.18±0.23                | 5.9x10 <sup>-3</sup> |
| Isoleucine    | 0.05±0.47                | 0.17±0.22                | 1.0x10 <sup>-3</sup> |
| Phenylalanine | -0.15±0.24               | 0.14±0.12                | 1.5x10 <sup>-1</sup> |
| Tryptophan    | -0.001±0.48              | 0.15±0.44                | 2.4x10 <sup>-2</sup> |
| Methionine    | -0.01±0.24               | 0.18±0.27                | 1.7x10 <sup>-1</sup> |
| Lysine        | -0.06±0.24               | 0.28±0.16                | 3.4x10 <sup>-2</sup> |
| Threonine     | -0.05±0.29               | 0.15±0.31                | 7.0x10 <sup>-2</sup> |
| Histidine     | -0.20±0.15               | 0.16±0.09                | 8.9x10 <sup>-4</sup> |
| Asparagine    | -0.34±0.27               | 0.08±0.29                | 3.2x10 <sup>-1</sup> |
| Arginine      | -0.32±0.32               | 0.31±0.39                | 8.6x10 <sup>-3</sup> |
| Glycine       | -0.34±0.18               | 0.09±0.21                | 7.7x10 <sup>-2</sup> |
| Glutamine     | -0.26±0.01               | 0.12±0.10                | 3.0x10 <sup>-3</sup> |
| Alanine       | -0.24±0.15               | 0.25±0.30                | 3.0x10 <sup>-1</sup> |
| Tyrosine      | 0.19±0.56                | 0.09±0.51                | 4.4x10 <sup>-3</sup> |
| Proline       | -0.20±0.16               | 0.21±0.11                | 3.5x10 <sup>-1</sup> |
| Serine        | -0.13±0.19               | 0.16±0.26                | 3.3x10 <sup>-1</sup> |
| Glutamate     | 0.06±0.02                | 0.33±0.24                | 4.2x10 <sup>-1</sup> |
| Aspartate     | -0.02±0.04               | 0.26±0.16                | 4.5x10 <sup>-1</sup> |

Supplementary Table S6. Relative amino acid levels across dietary conditions.



**A**

| Tracer     | Dose ( $\mu\text{mol/g}$ bodyweight) |
|------------|--------------------------------------|
| Glucose    | 2, 4, 8                              |
| Valine     | 0.2, 0.4, 1                          |
| Leucine    | 0.24, 0.48, 1                        |
| Methionine | 0.1, 0.2, 0.5                        |
| Lysine     | 0.2, 0.4, 1                          |
| Alanine    | 0.5, 1, 2                            |
| 3-HB       | 0.1, 0.2, 0.4                        |
| Citrate    | 0.15, 0.3, 0.45                      |
| Serine     | 0.25, 0.5, 1                         |

**B**

| Tracer        | Infusion rate<br>( $\text{nmol/g}$ bodyweight/ $\text{min}$ ) |
|---------------|---------------------------------------------------------------|
| Glucose       | 20, 40, 60, 80                                                |
| Valine        | 1, 2, 5, 10, 20, 30                                           |
| Lysine        | 1, 2, 5, 8, 10, 15, 20                                        |
| Phenylalanine | 1, 8, 10, 15, 20, 25                                          |
| Methionine    | 1, 5, 10                                                      |
| Alanine       | 5, 10, 15, 20, 60, 150, 200                                   |
| 3-HB          | 4, 20, 40, 60, 80, 100                                        |
| Citrate       | 3, 6, 20, 30, 40                                              |
| Serine        | 2.5, 5, 10, 20, 40, 50, 60                                    |

Supplementary Table S7. Doses used for intravenous bolus injections and infusions for each tracer.
